# Supplementary material for: Computational screening of transition-metal atom embedding in 1T-TaS2 monolayer defects as efficient oxygen-reduction/evolution-reaction bifunctional catalysts
Source: Royal Society of Chemistry journal article supplement (doi:10.1039/d5cp00809c), 2025-01-01
Supplement: d5cp00809c2.zip [file d5cp00809c2.zip]

**Supplementary information for "Computational screening of transition-metal atom  
embedding in 1T-TaS<sub>2</sub> monolayer defects as efficient  
oxygen-reduction/evolution-reaction bifunctional catalysts."**

Junkai Xu<sup>1</sup>, Xiaoxue Yu<sup>1</sup>, Yuebo Gao<sup>1</sup>, Yunhao Wang<sup>1</sup>, Jianjun

Fang<sup>1,\*</sup>, Jing Li<sup>1,†</sup>, Xianfang Yue<sup>2,‡</sup> and A. J. C. Varandas<sup>1,3,4§</sup>

<sup>1</sup>*School of Physics and Physical Engineering, Qufu Normal University, Qufu, Shandong 273165, China*

<sup>2</sup>*Department of Physics and Information Engineering, Jining University, Qufu 273155, China*

<sup>3</sup>*Department of Physics, Universidade Federal do Espírito Santo, 29075-910 Vitória, Brazil and*

<sup>4</sup>*Department of Chemistry and Coimbra Chemistry Centre,  
University of Coimbra, 3004-535 Coimbra, Portugal*

(Dated: May 12, 2025)

PACS numbers:

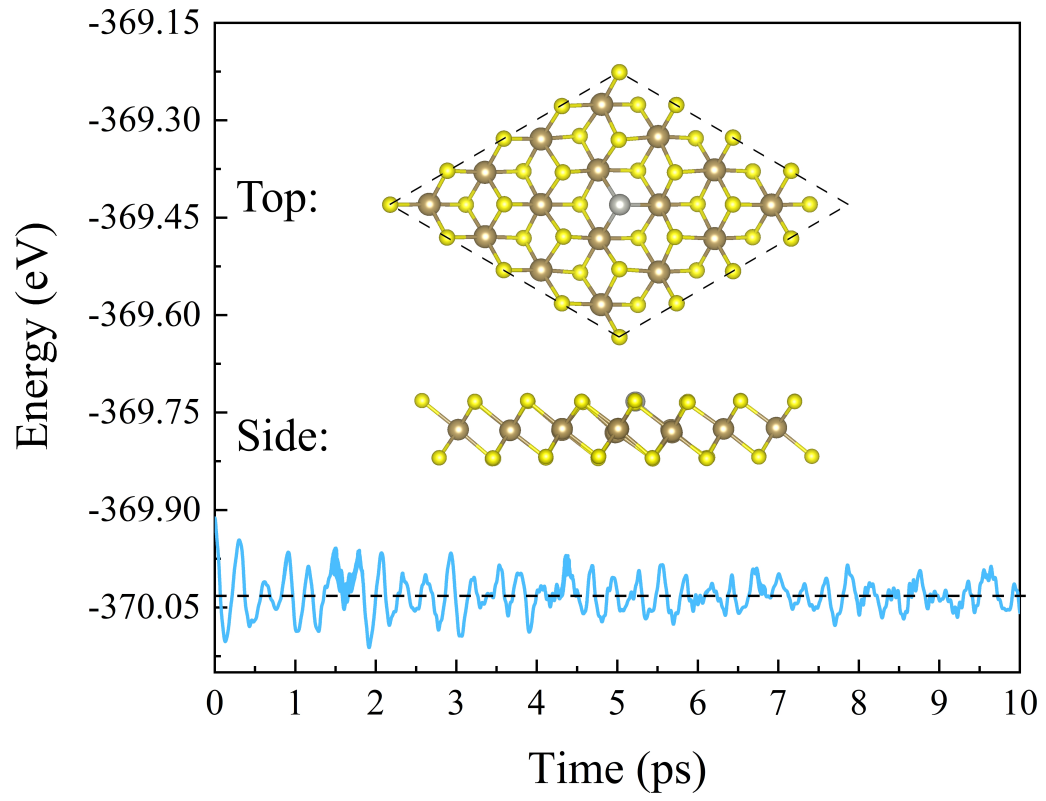

FIG. S1: AIMD simulations of Pd@1T-TaS<sub>2</sub> at 500 K with insets corresponding to the final state structures.

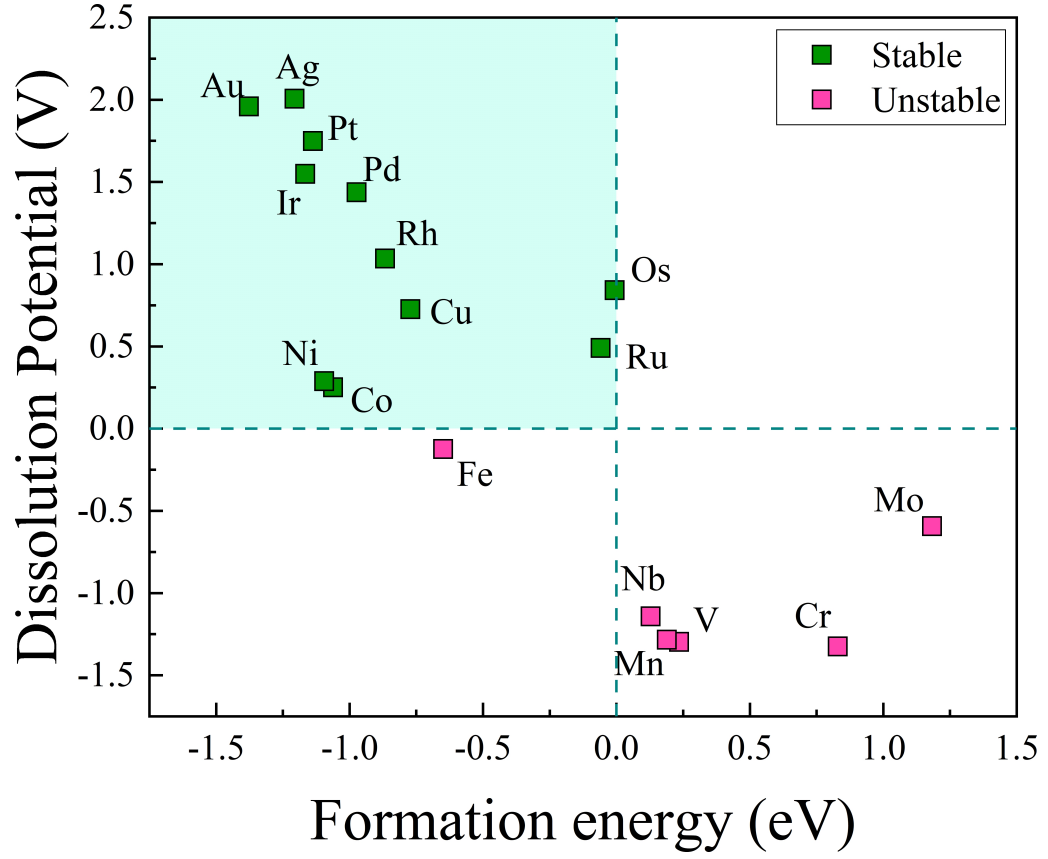

FIG. S2: Formation energy ( $E_{form}$ ) and dissolution potential ( $U_{diss}$ ) of TM atoms on TM@1T-TaS<sub>2</sub>.

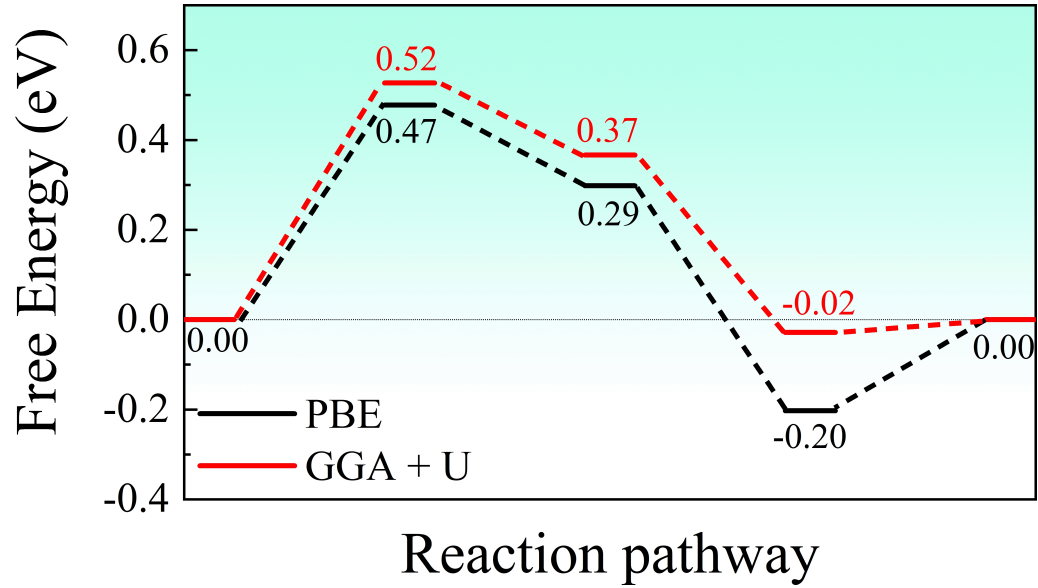

FIG. S3: Free energy change diagram for four-electron transfers on Pd@1T-TaS<sub>2</sub>, the red line represents the GGA + U method and the black line represents the PBE method.

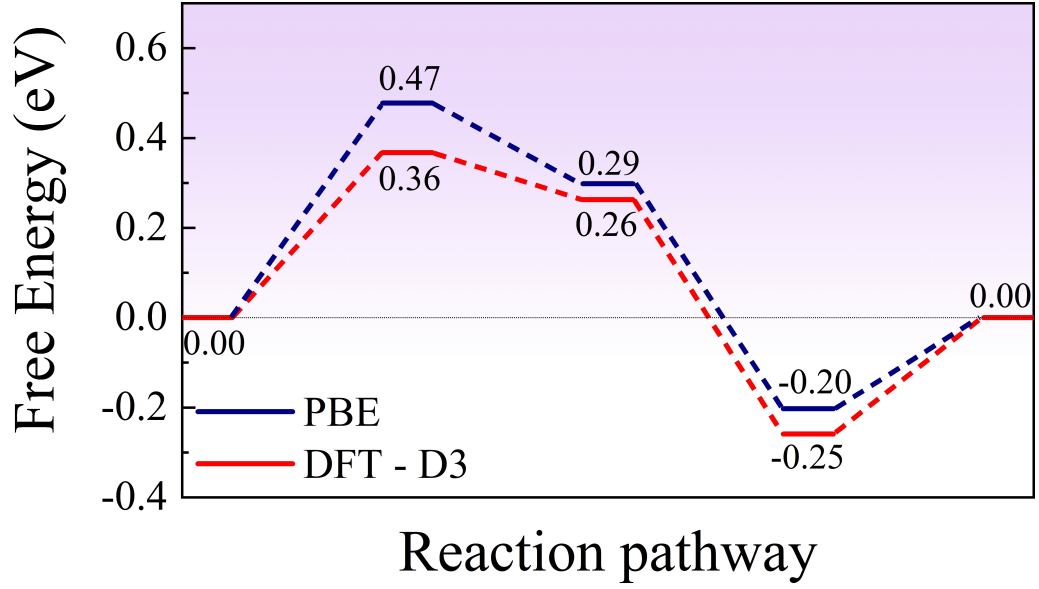

FIG. S4: Free energy change diagram for four-electron transfers on Pd@1T-TaS<sub>2</sub>, the red line represents the DFT - D3 method and the navy blue line represents the PBE method.

TABLE S1: The computed  $E_{bind}$ ,  $E_{coh}$ ,  $E_{form}$

|                        | $E_{bind}$ | $E_{coh}$ | $E_{form}$ |
|------------------------|------------|-----------|------------|
| V@1T-TaS <sub>2</sub>  | -5.07      | -5.31     | 0.23       |
| Cr@1T-TaS <sub>2</sub> | -3.27      | -4.10     | 0.82       |
| Mn@1T-TaS <sub>2</sub> | -2.73      | -2.92     | 0.18       |
| Fe@1T-TaS <sub>2</sub> | -4.92      | -4.28     | -0.64      |
| Co@1T-TaS <sub>2</sub> | -5.45      | -4.39     | -1.06      |
| Ni@1T-TaS <sub>2</sub> | -5.53      | -4.44     | -1.09      |
| Cu@1T-TaS <sub>2</sub> | -4.26      | -3.49     | -0.77      |
| Nb@1T-TaS <sub>2</sub> | -7.44      | -7.57     | 0.12       |
| Mo@1T-TaS <sub>2</sub> | -5.63      | -6.82     | 1.18       |
| Ru@1T-TaS <sub>2</sub> | -6.79      | -6.74     | -0.05      |
| Rh@1T-TaS <sub>2</sub> | -6.61      | -5.75     | -0.86      |
| Pd@1T-TaS <sub>2</sub> | -4.86      | -3.89     | -0.97      |
| Ag@1T-TaS <sub>2</sub> | -4.15      | -2.95     | -1.20      |
| Os@1T-TaS <sub>2</sub> | -8.17      | -8.17     | -0.01      |
| Ir@1T-TaS <sub>2</sub> | -8.10      | -6.94     | -1.16      |
| Pt@1T-TaS <sub>2</sub> | -6.97      | -5.84     | -1.13      |
| Au@1T-TaS <sub>2</sub> | -5.18      | -3.81     | -1.37      |

of TM@1T-TaS<sub>2</sub>.



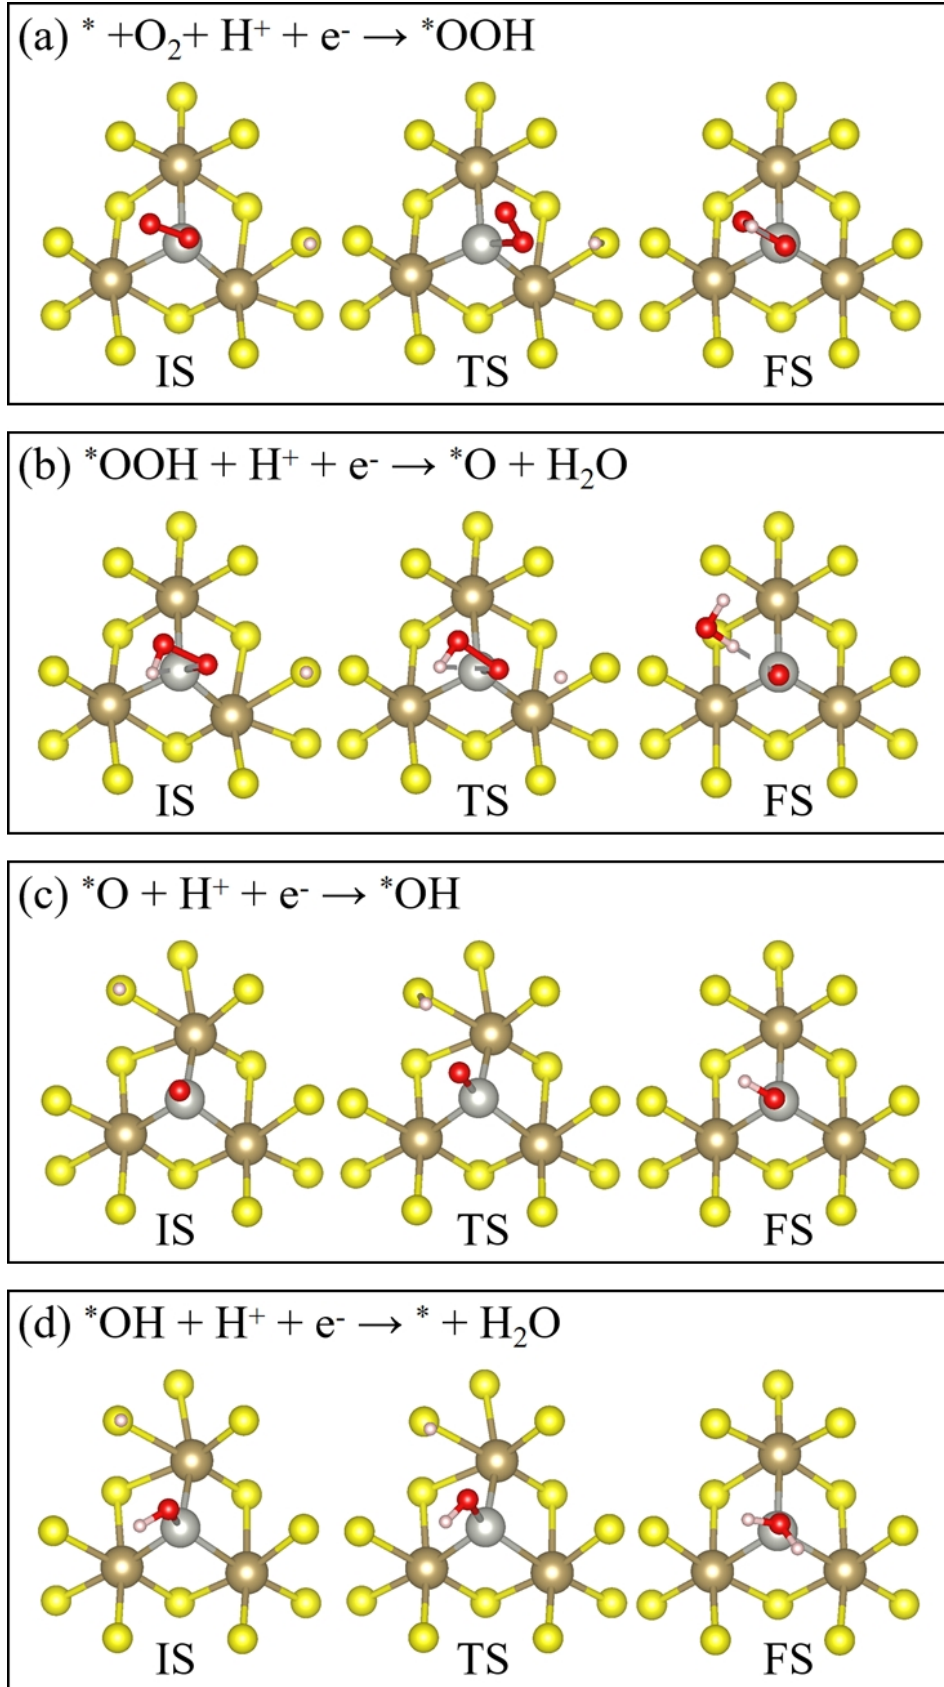

FIG. S5: Structure of the initial, final and transition states involved in the four-electron transfer process on Pd@1-TaS<sub>2</sub>: (a)  $* + \text{O}_2 + \text{H}^+ + \text{e}^- \rightarrow *\text{OOH}$ , (b)  $*\text{OOH} + \text{H}^+ + \text{e}^- \rightarrow *\text{O} + \text{H}_2\text{O}$ , (c)  $*\text{O} + \text{H}^+ + \text{e}^- \rightarrow *\text{OH}$ , (d)  $*\text{OH} + \text{H}^+ + \text{e}^- \rightarrow * + \text{H}_2\text{O}$ .

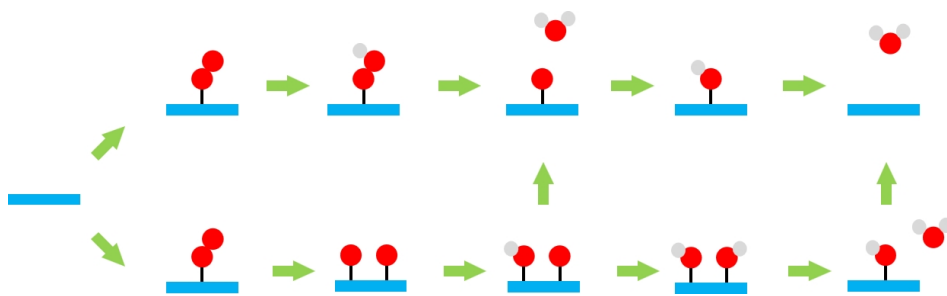

FIG. S6: Association and dissociation pathways of O<sub>2</sub> on catalysts.

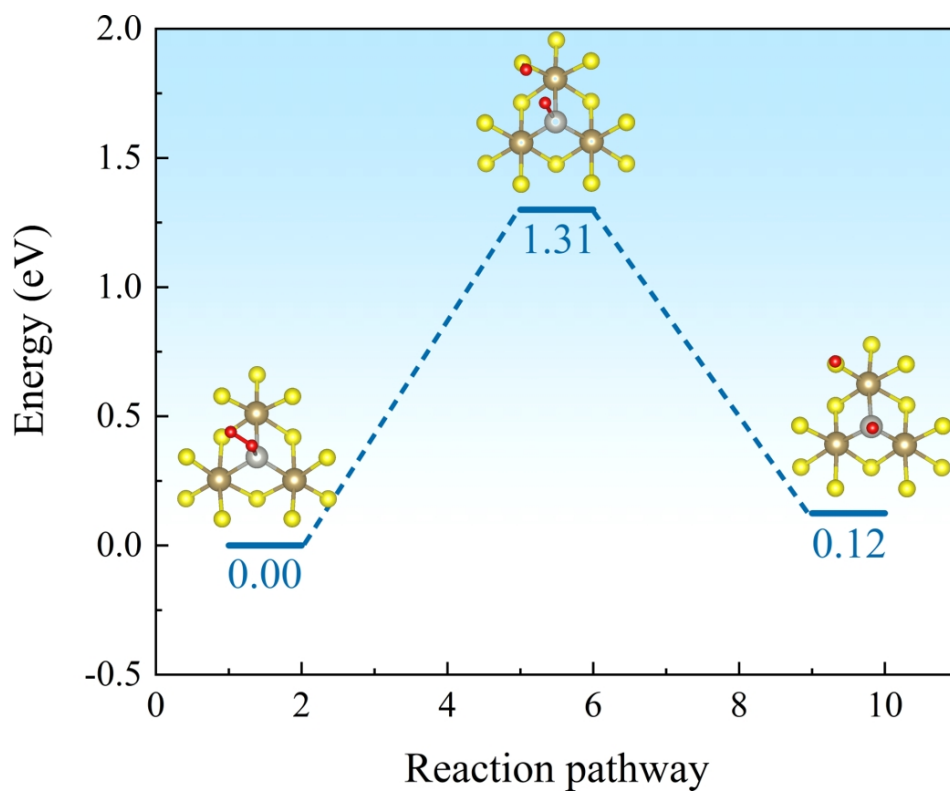

FIG. S7: Energy barrier for O<sub>2</sub> dissociation on Pd@1T-TaS<sub>2</sub>, with insets corresponding to the corresponding structures.

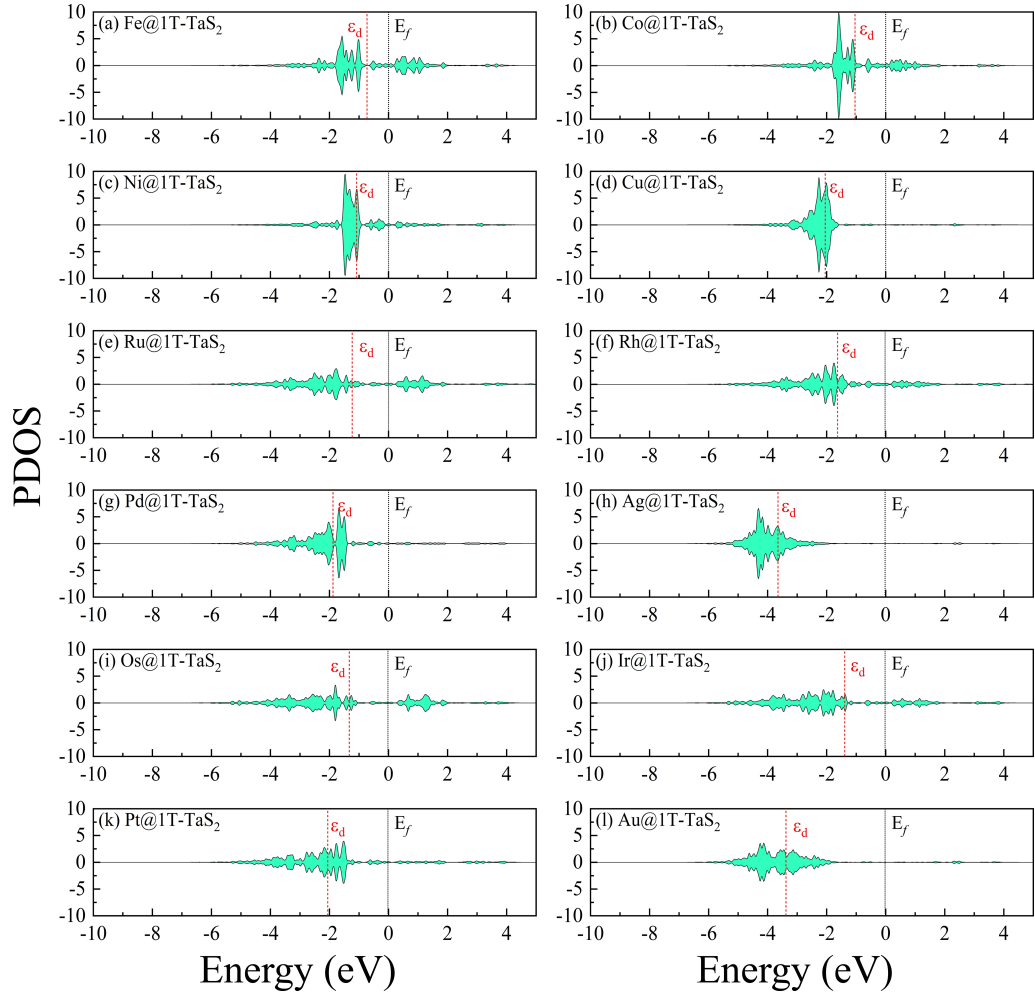

FIG. S8: Partial density of states (PDOS) of d orbitals for TM@1T-TaS<sub>2</sub>, the d-band centers ( $\epsilon_d$ ) are marked by red dashed, and the Fermi level ( $E_f$ ) are set to 0 eV.

TABLE S2: The computed adsorption energy of  $^*\text{OH}$ ,  $^*\text{O}$ ,  $^*\text{OOH}$  of TM@1T-TaS<sub>2</sub>.

|                        | $\Delta G_{^*\text{OH}}$ | $\Delta G_{^*\text{O}}$ | $\Delta G_{^*\text{OOH}}$ |
|------------------------|--------------------------|-------------------------|---------------------------|
| Fe@1T-TaS <sub>2</sub> | -0.24                    | 0.83                    | 3.06                      |
| Co@1T-TaS <sub>2</sub> | -0.18                    | 0.92                    | 3.10                      |
| Ni@1T-TaS <sub>2</sub> | 0.20                     | 1.78                    | 3.55                      |
| Cu@1T-TaS <sub>2</sub> | 0.76                     | 3.01                    | 4.03                      |
| Ru@1T-TaS <sub>2</sub> | 0.00                     | 1.11                    | 3.21                      |
| Rh@1T-TaS <sub>2</sub> | 0.26                     | 1.53                    | 3.46                      |
| Pd@1T-TaS <sub>2</sub> | 1.04                     | 2.77                    | 4.18                      |
| Ag@1T-TaS <sub>2</sub> | 1.44                     | 4.03                    | 4.61                      |
| Os@1T-TaS <sub>2</sub> | -0.41                    | 0.60                    | 2.84                      |
| Ir@1T-TaS <sub>2</sub> | -0.27                    | 0.71                    | 3.00                      |
| Pt@1T-TaS <sub>2</sub> | 0.75                     | 1.84                    | 4.08                      |
| Au@1T-TaS <sub>2</sub> | 1.30                     | 3.37                    | 4.51                      |
