# Supplementary figures and images for: Computational screening of transition-metal atom embedding in 1T-TaS2 monolayer defects as efficient oxygen-reduction/evolution-reaction bifunctional catalysts
Source: Royal Society of Chemistry journal article supplement (doi:10.1039/d5cp00809c), 2025-01-01

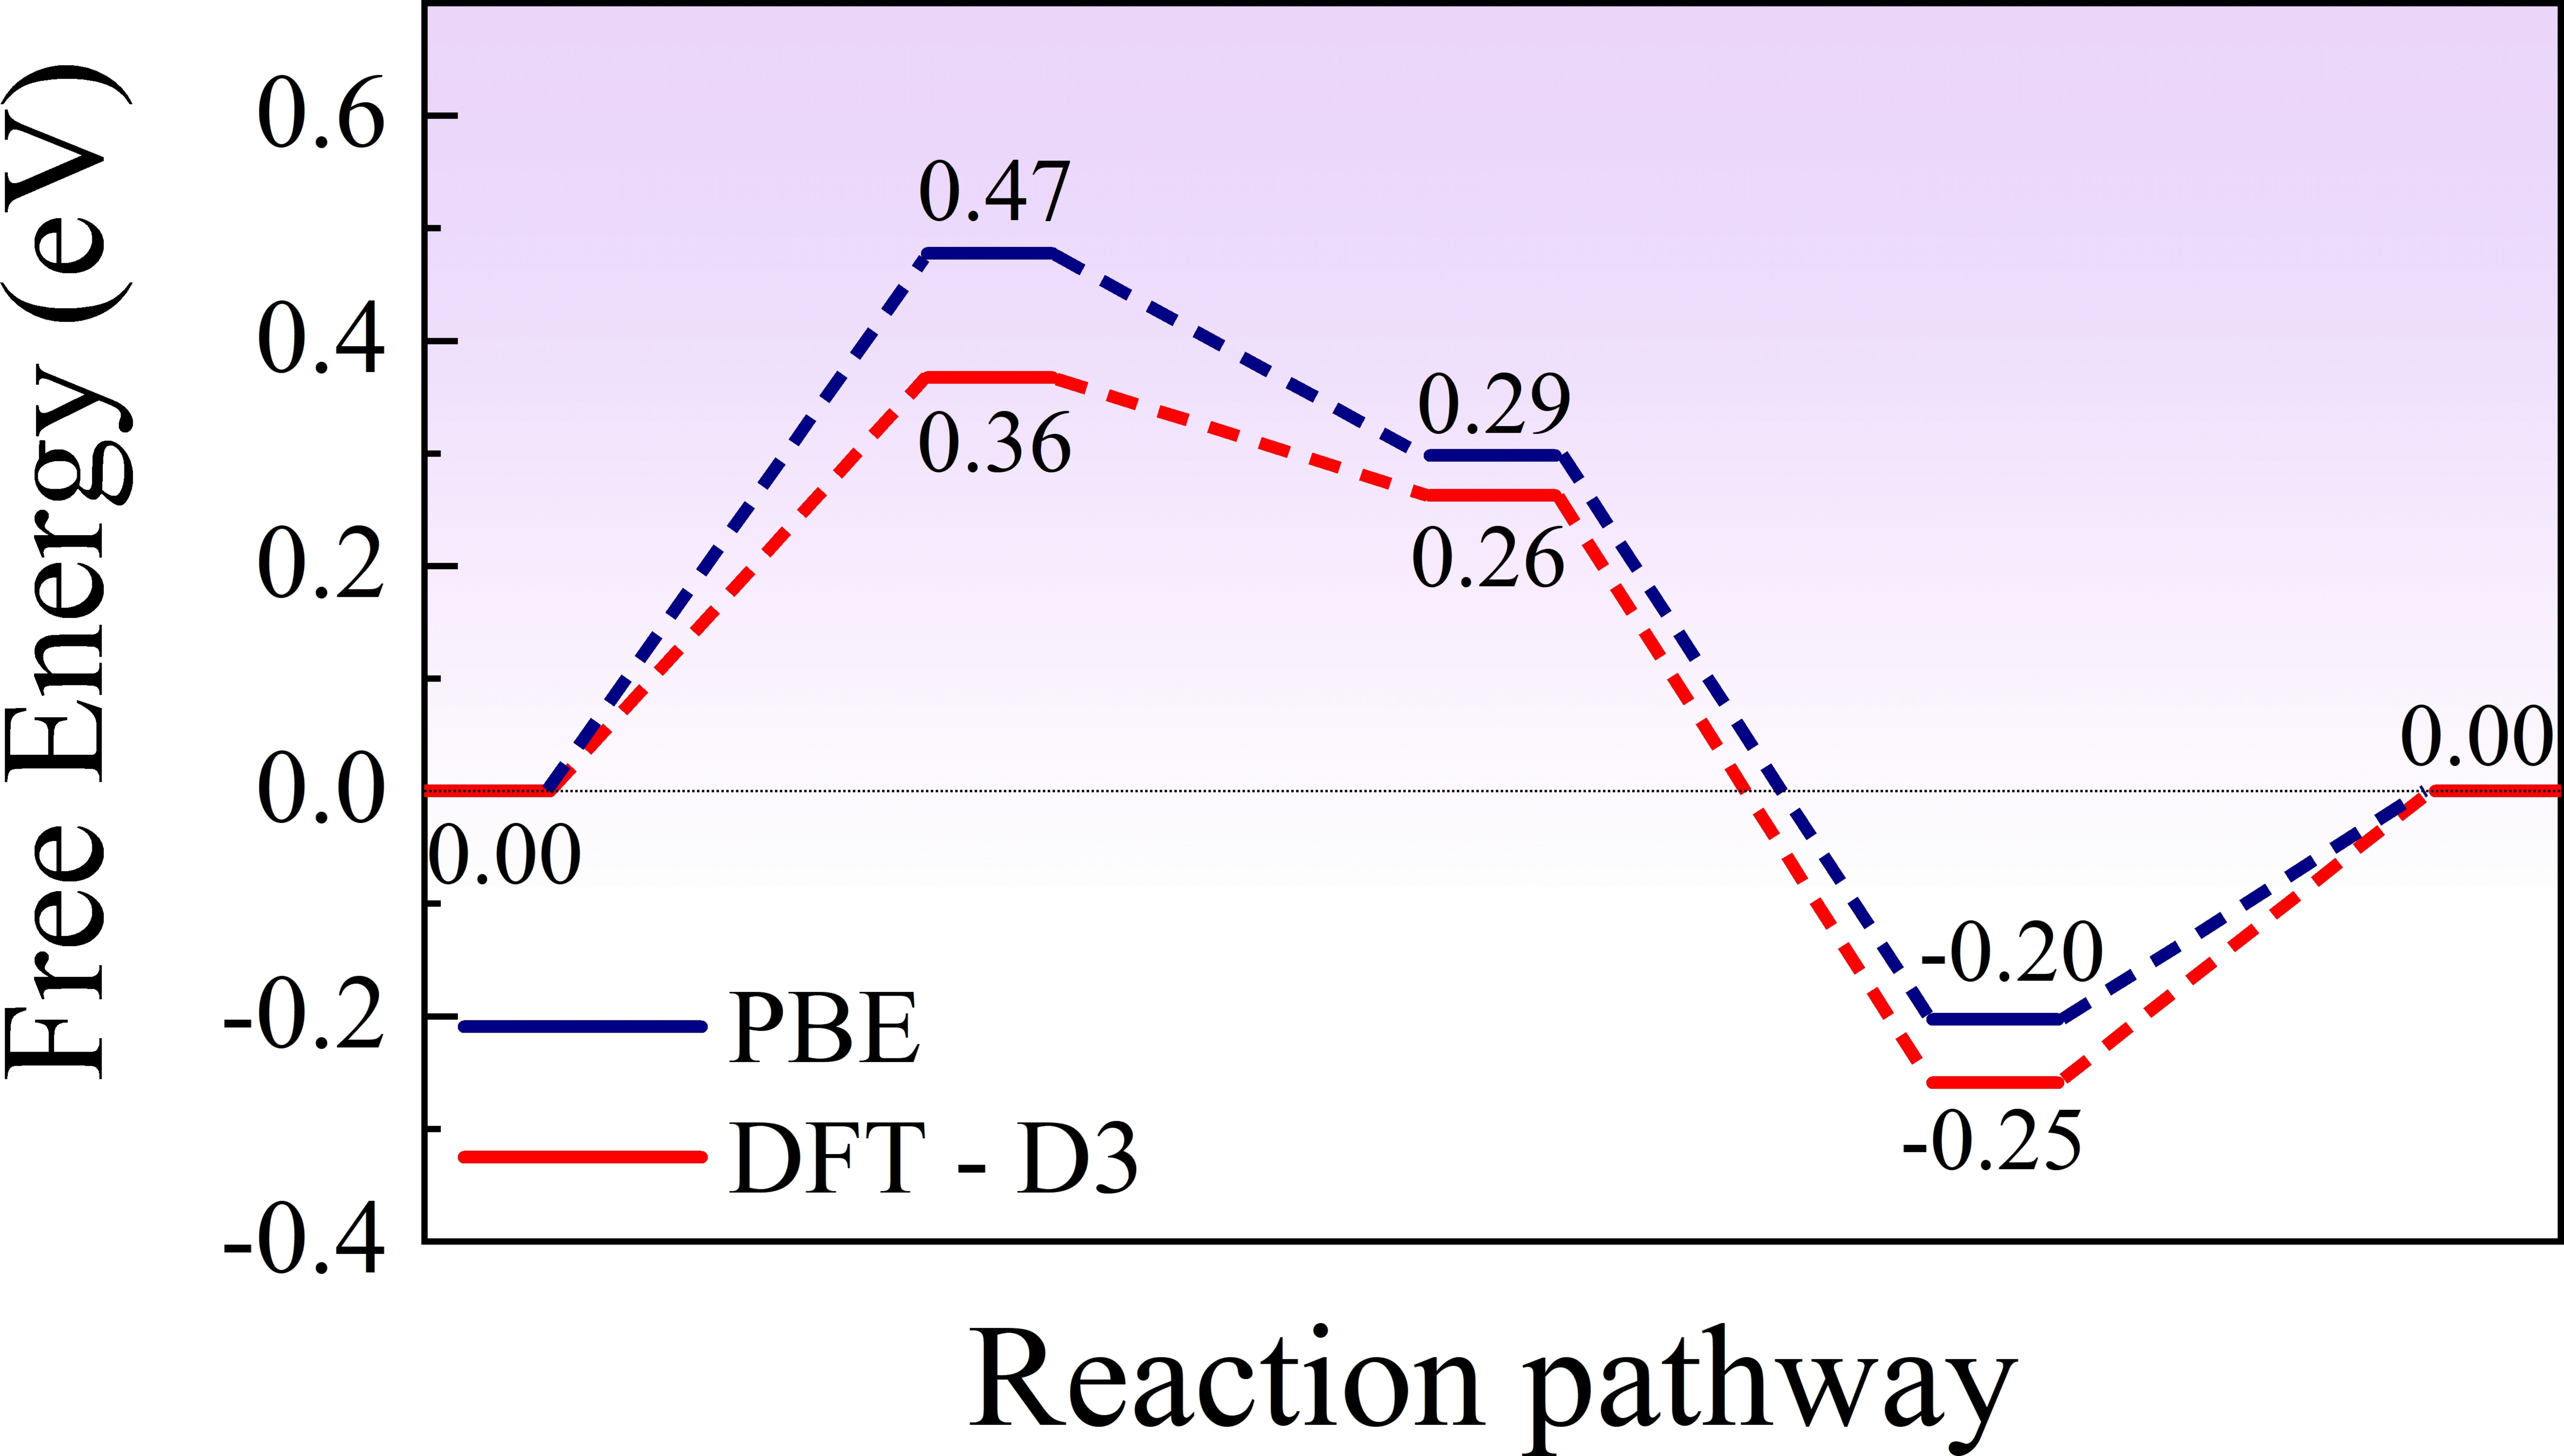

Supplement: d5cp00809c2.zip [file d5cp00809c2.zip]

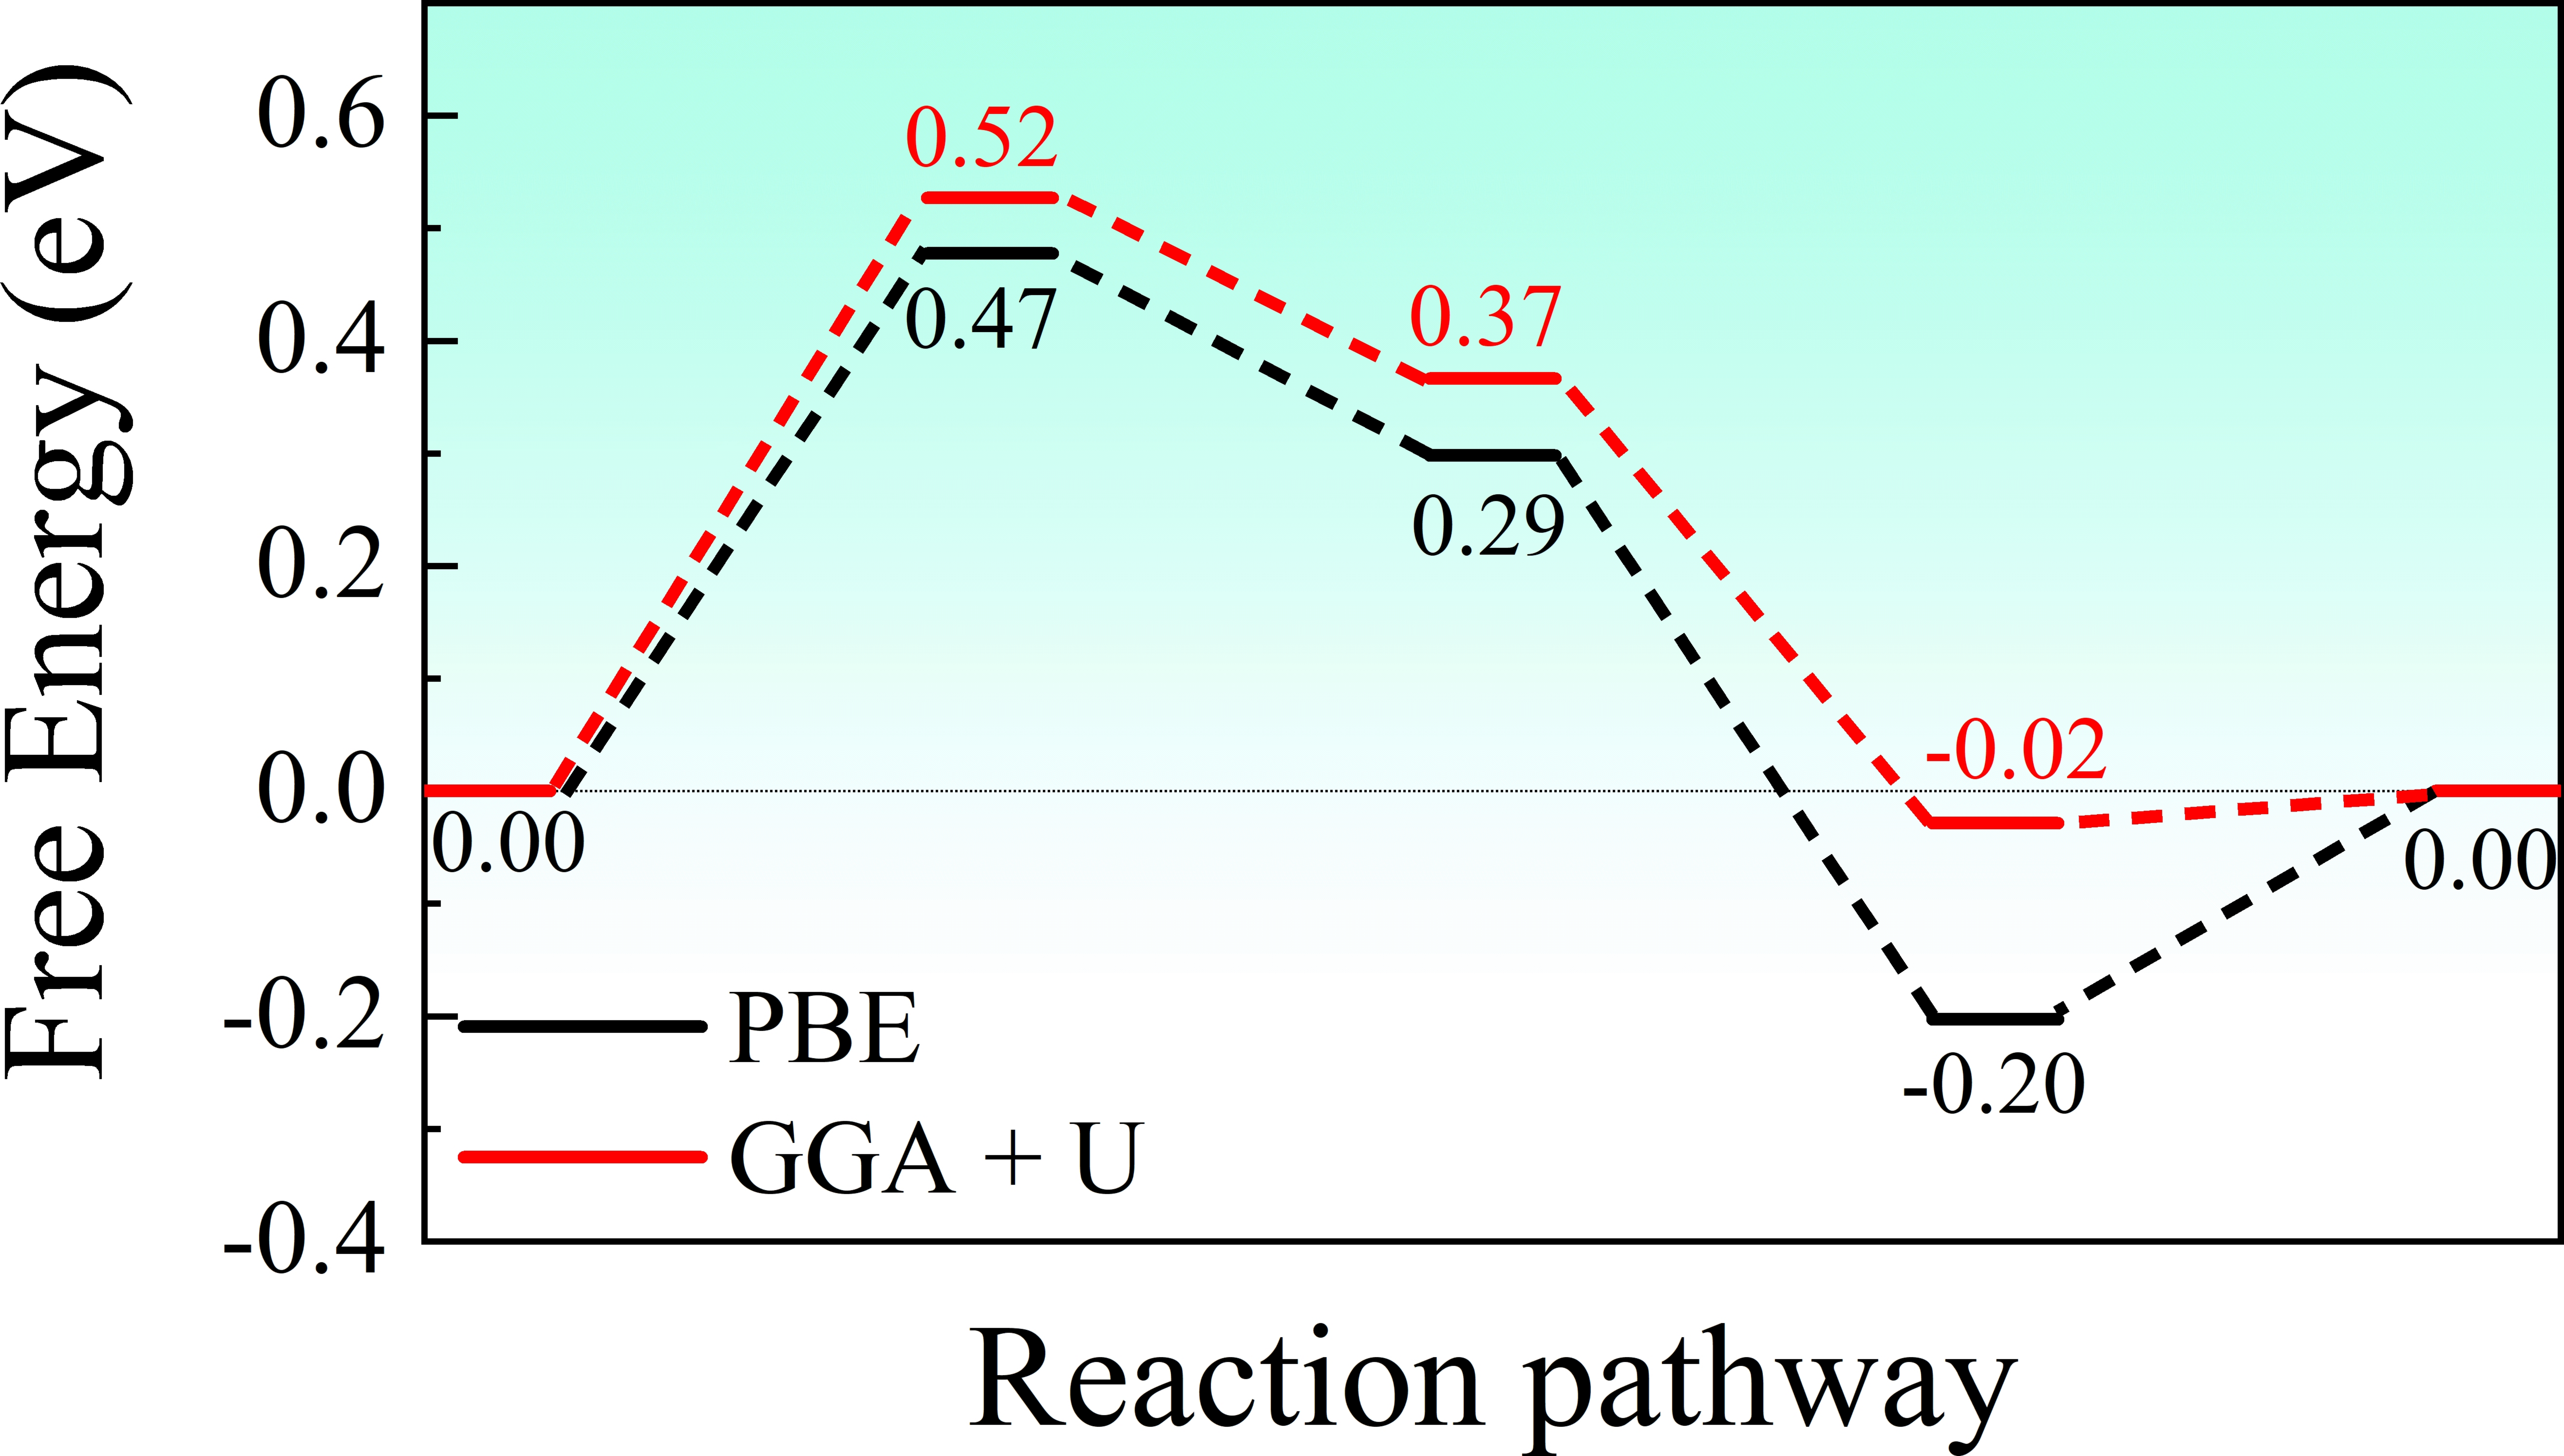

Supplement: d5cp00809c2.zip [file d5cp00809c2.zip]

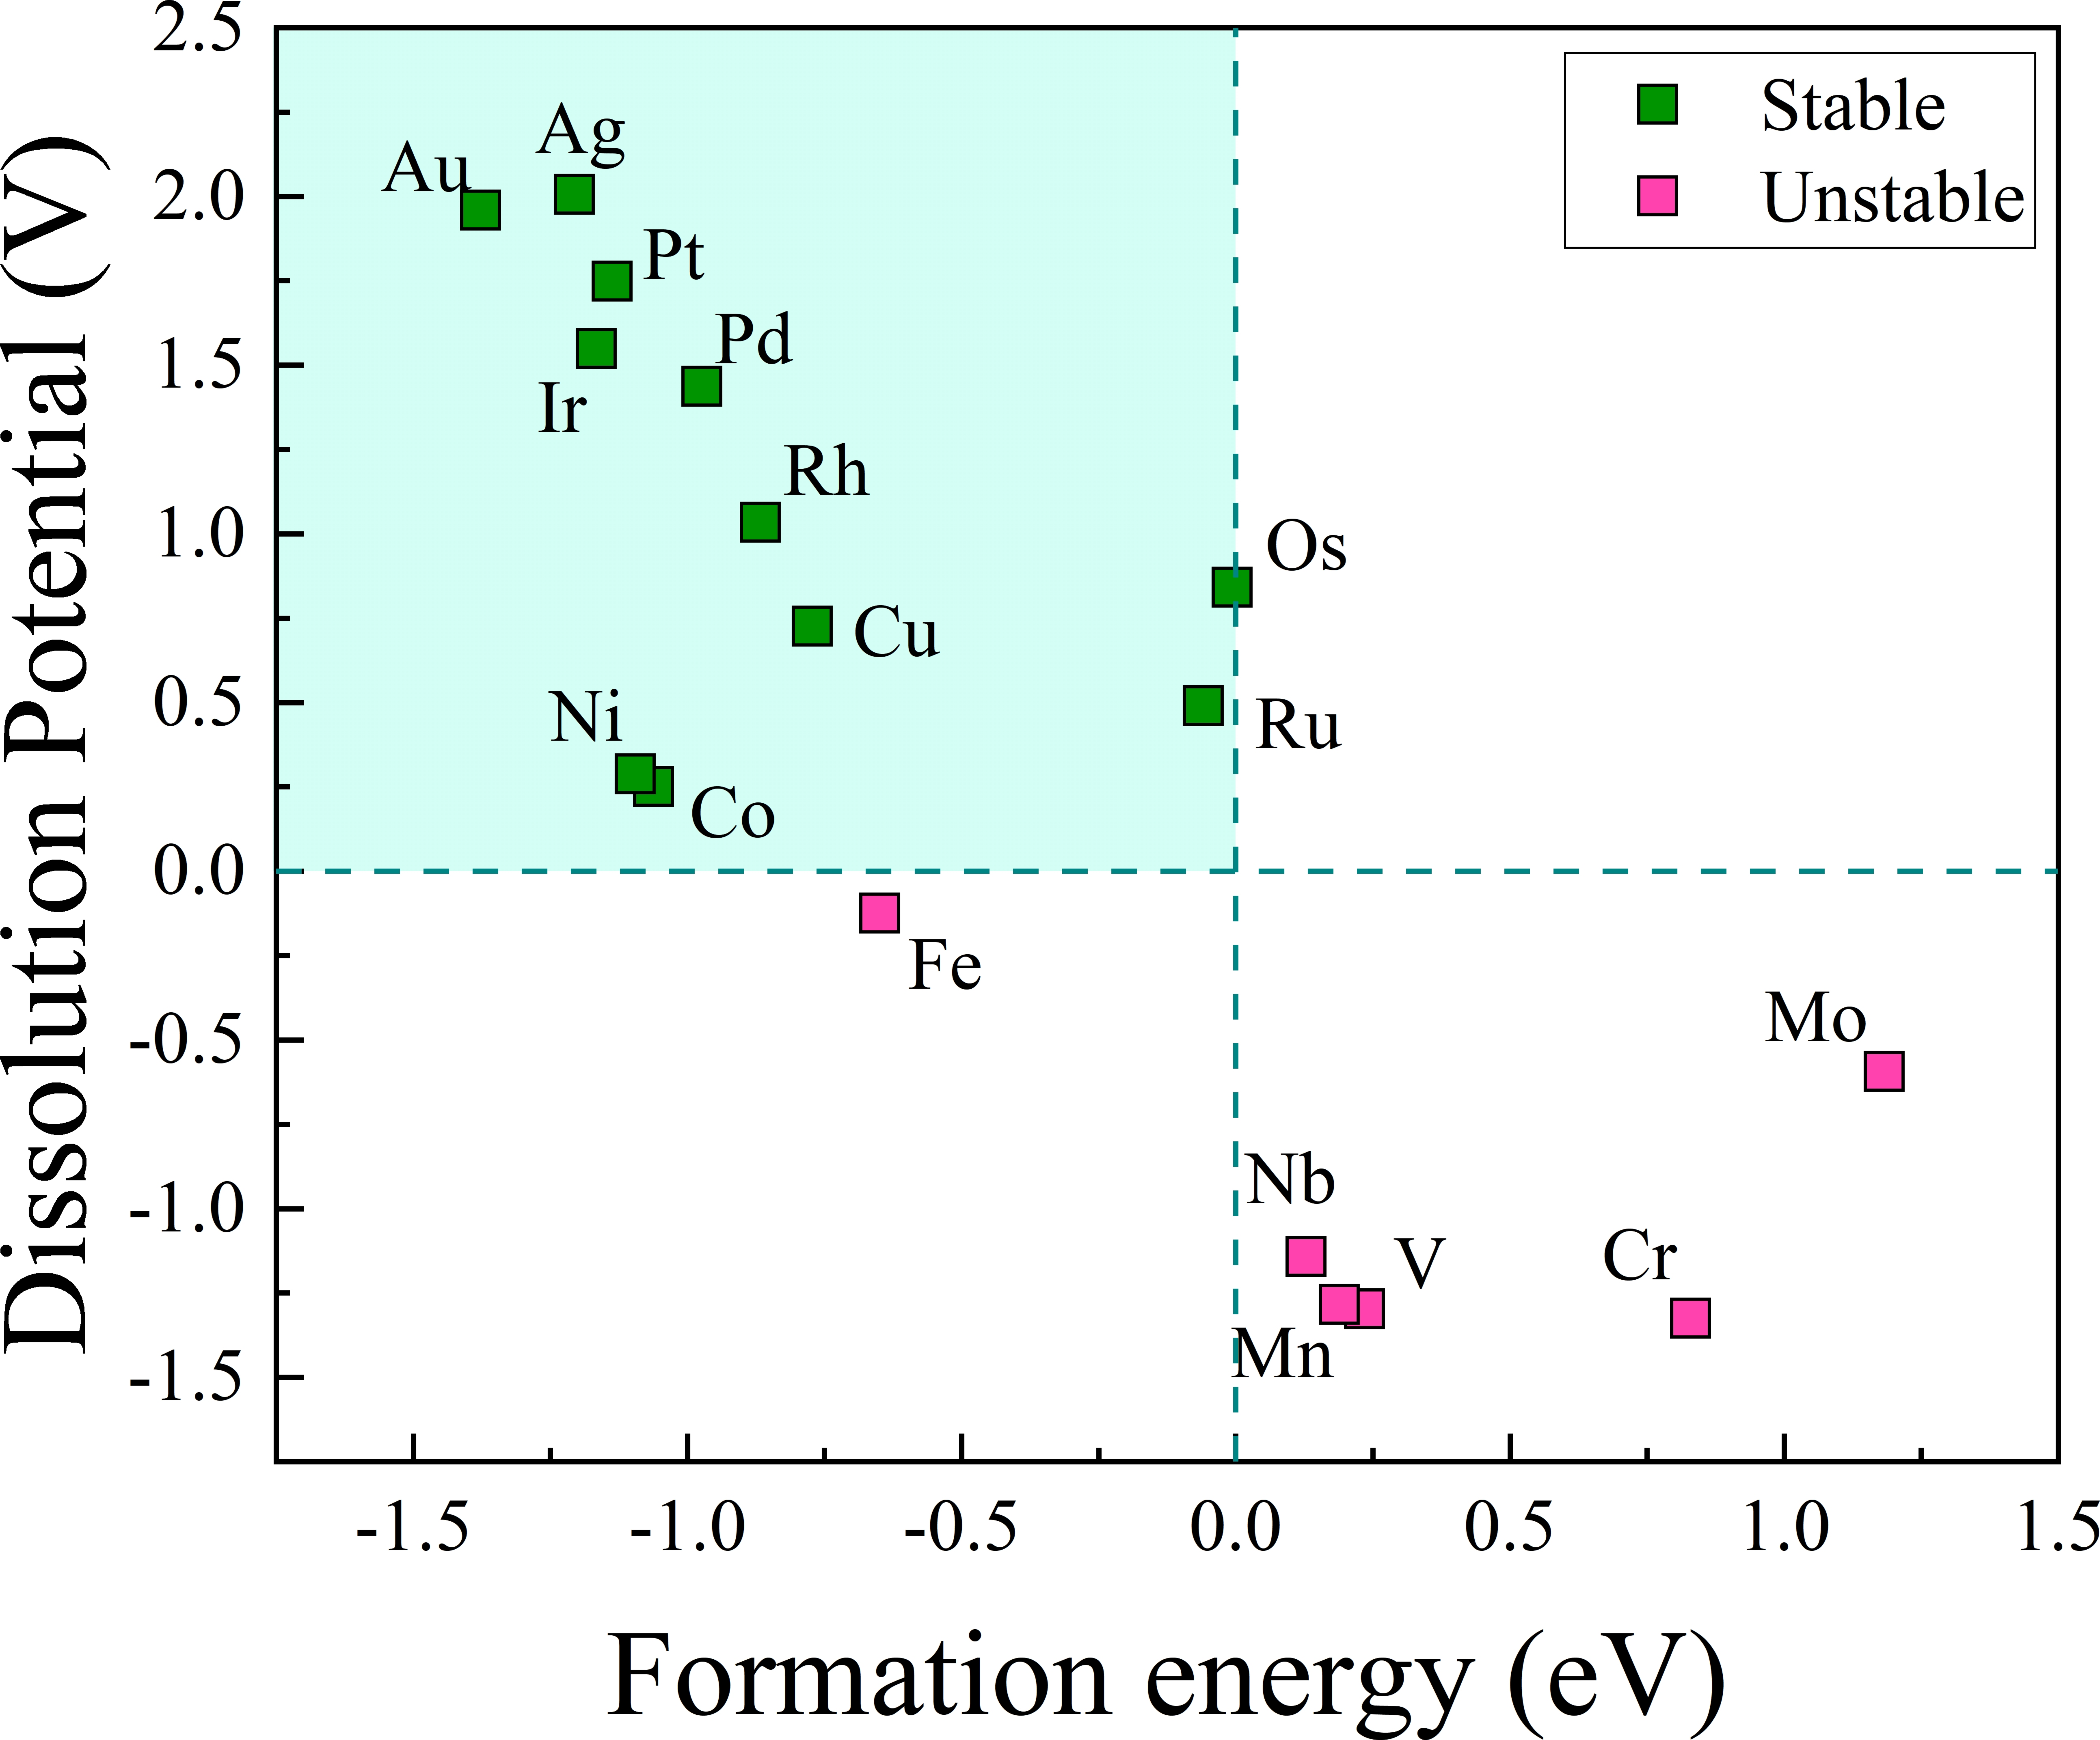

Supplement: d5cp00809c2.zip [file d5cp00809c2.zip]

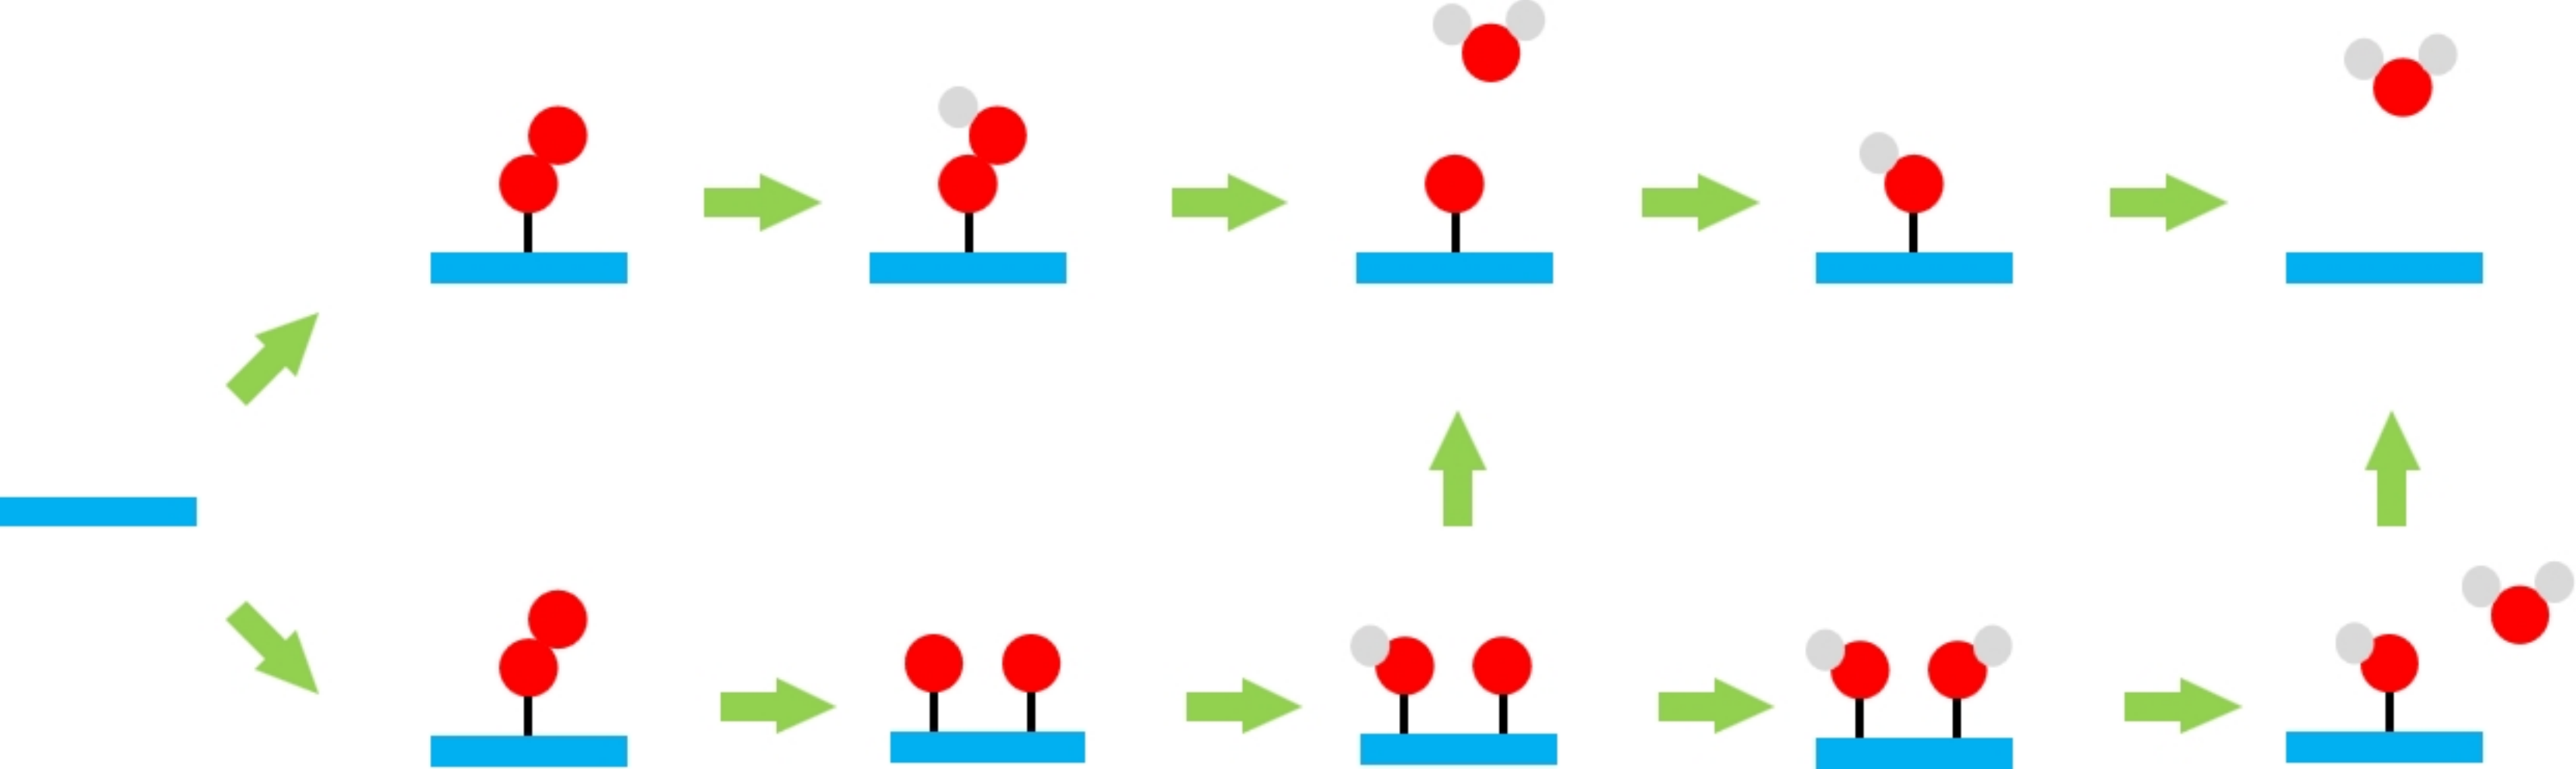

Supplement: d5cp00809c2.zip [file d5cp00809c2.zip]

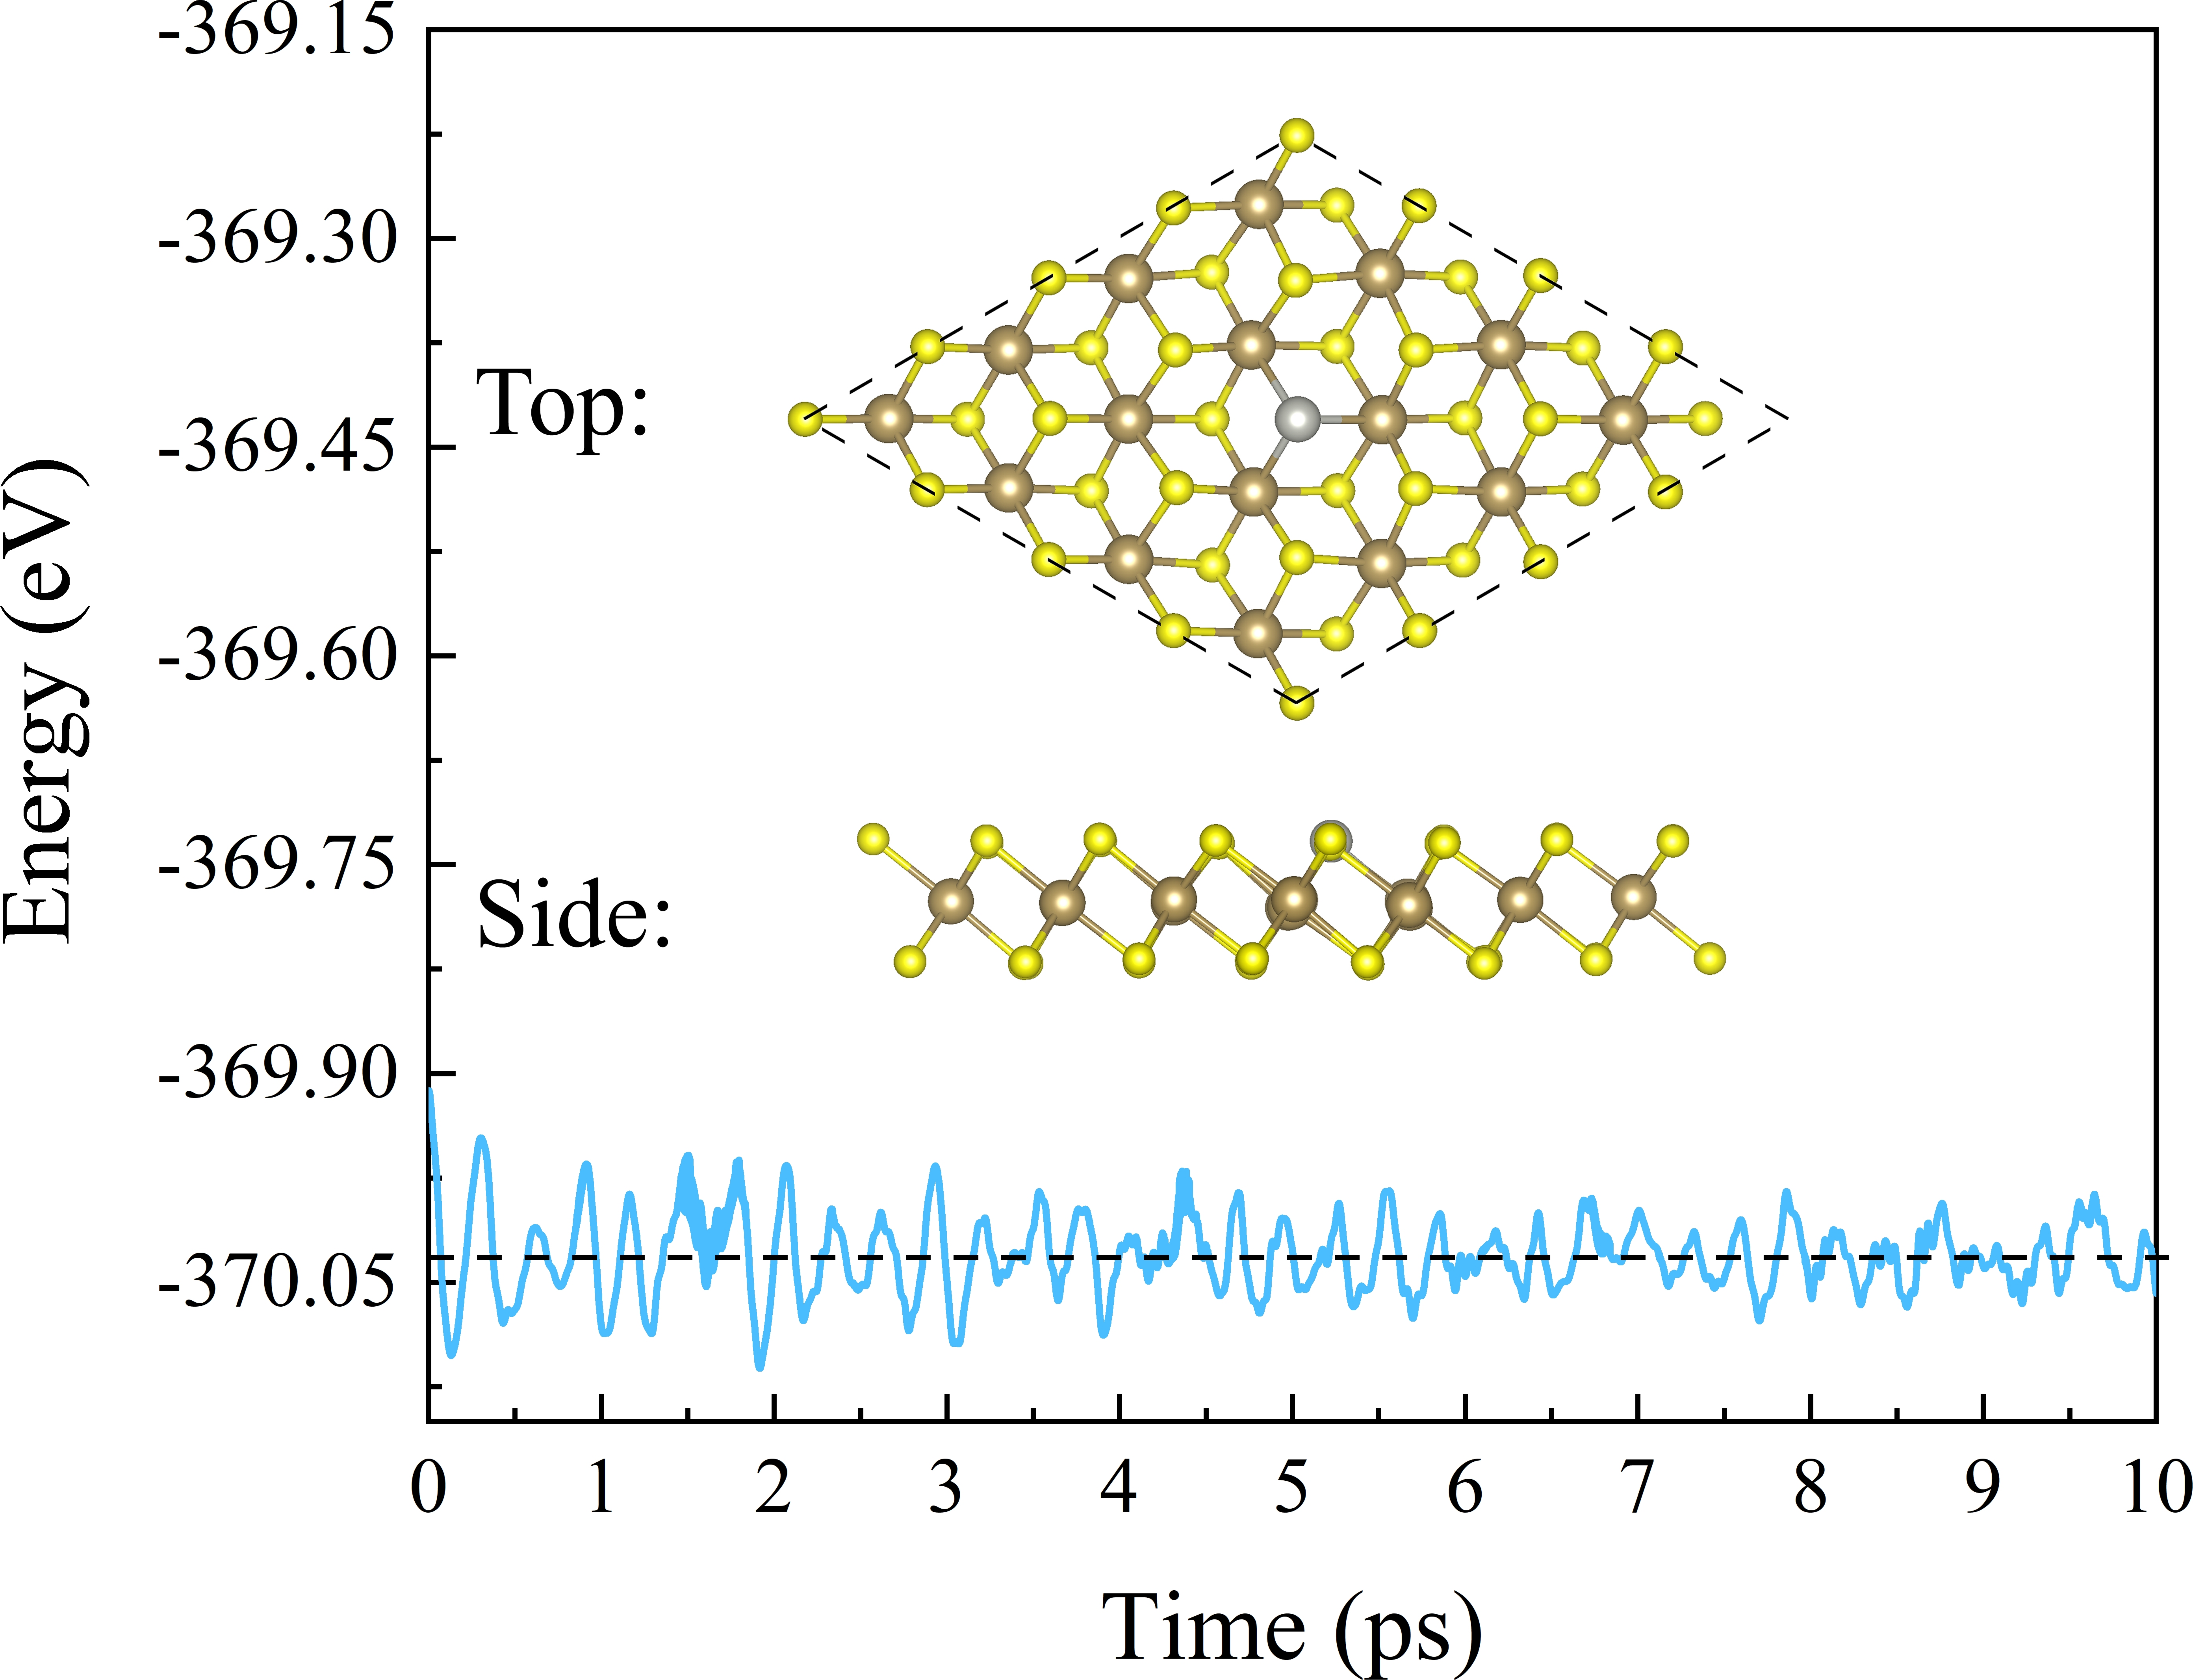

Supplement: d5cp00809c2.zip [file d5cp00809c2.zip]

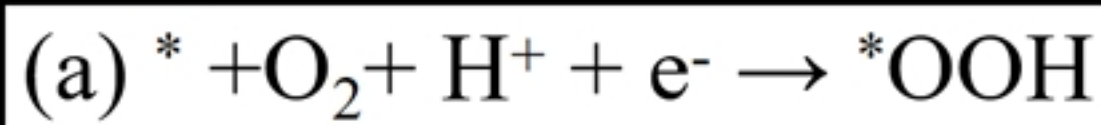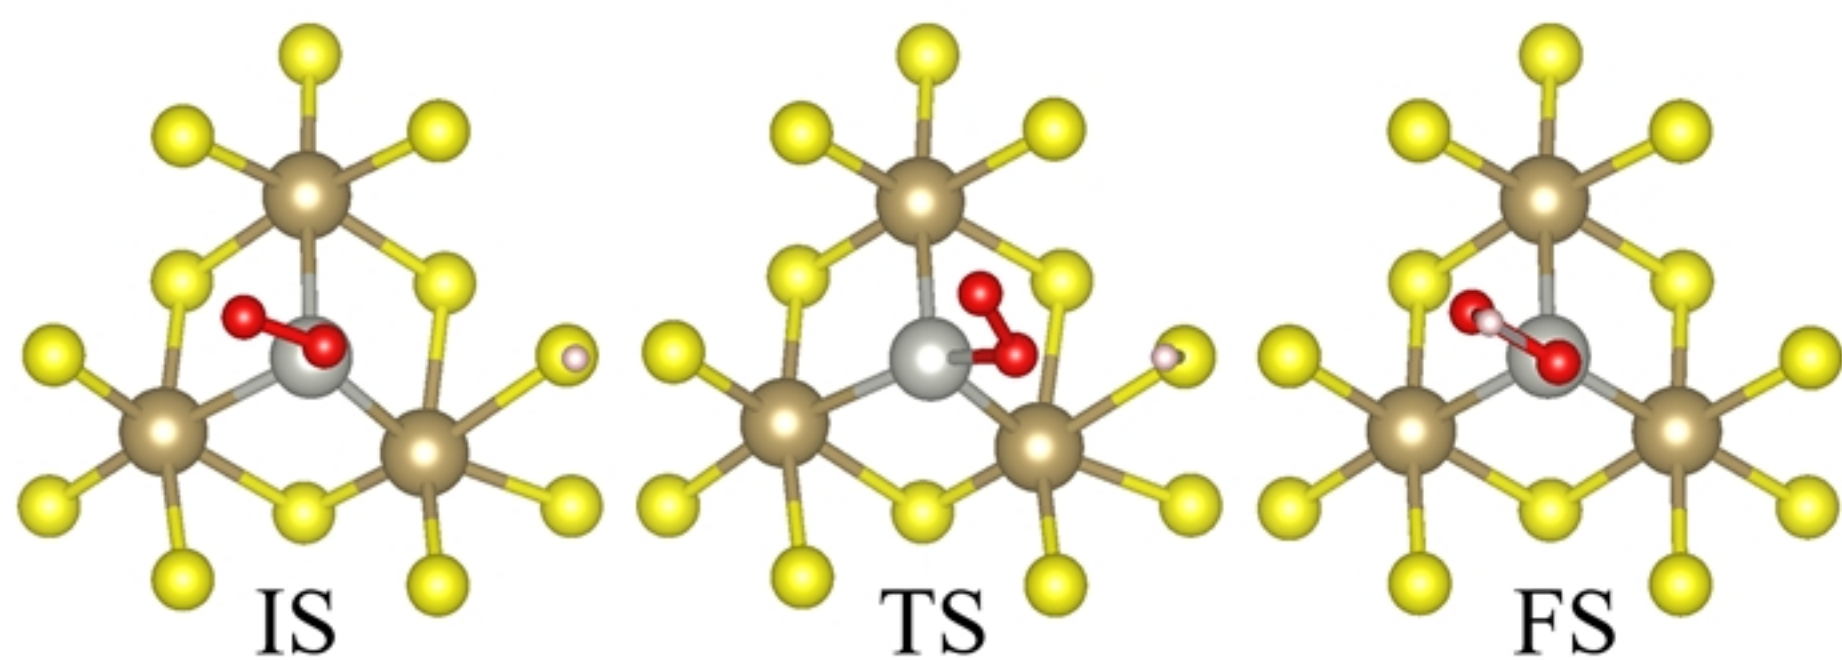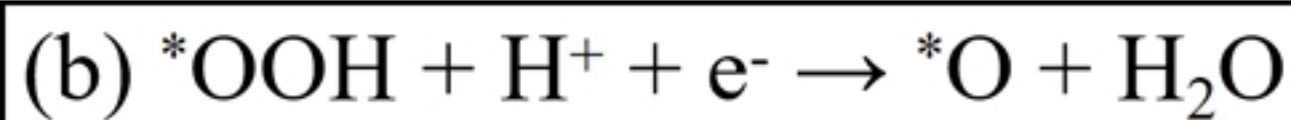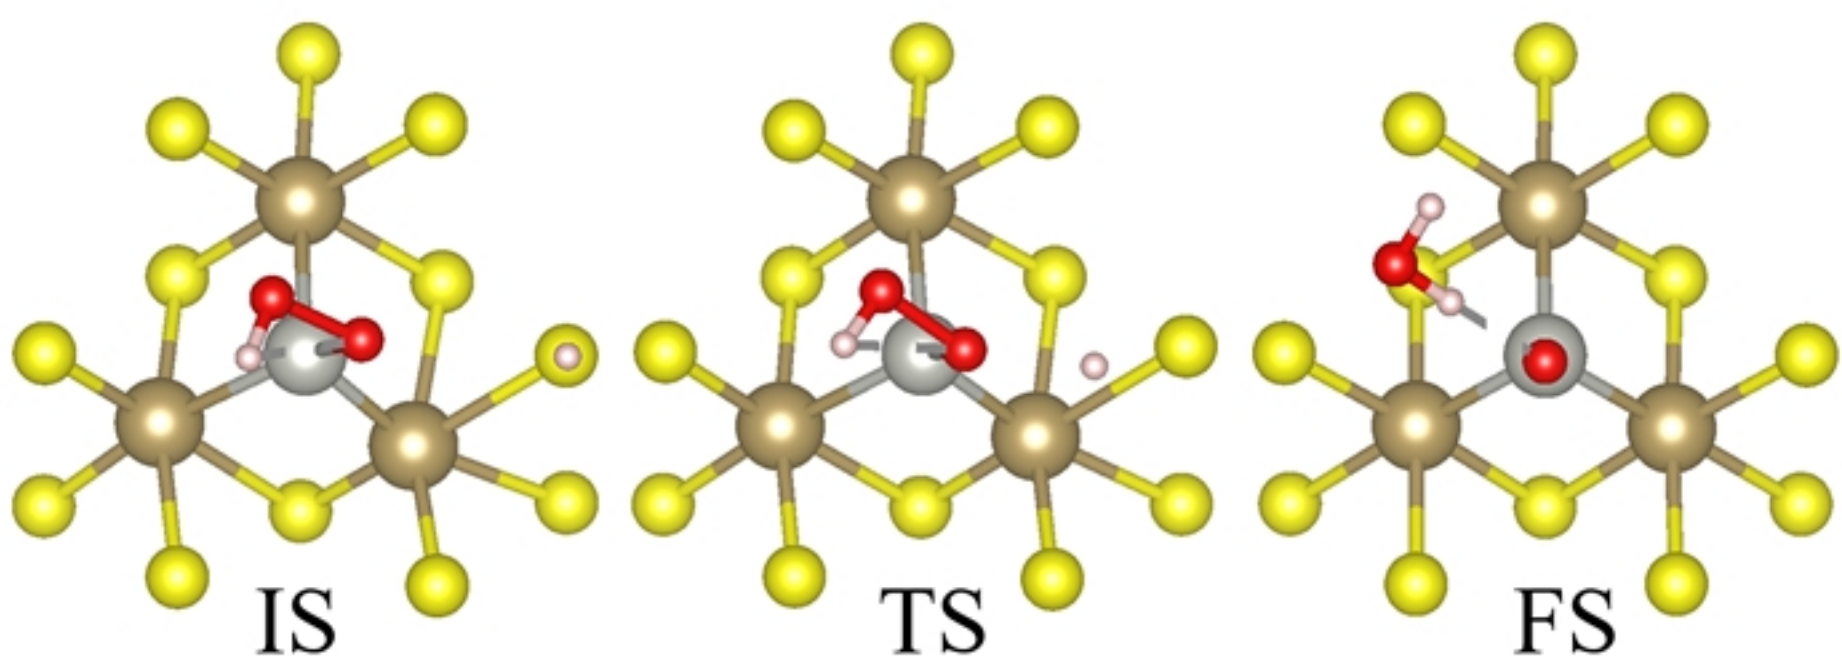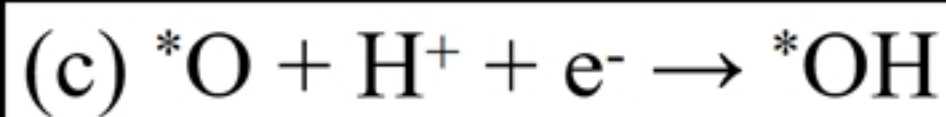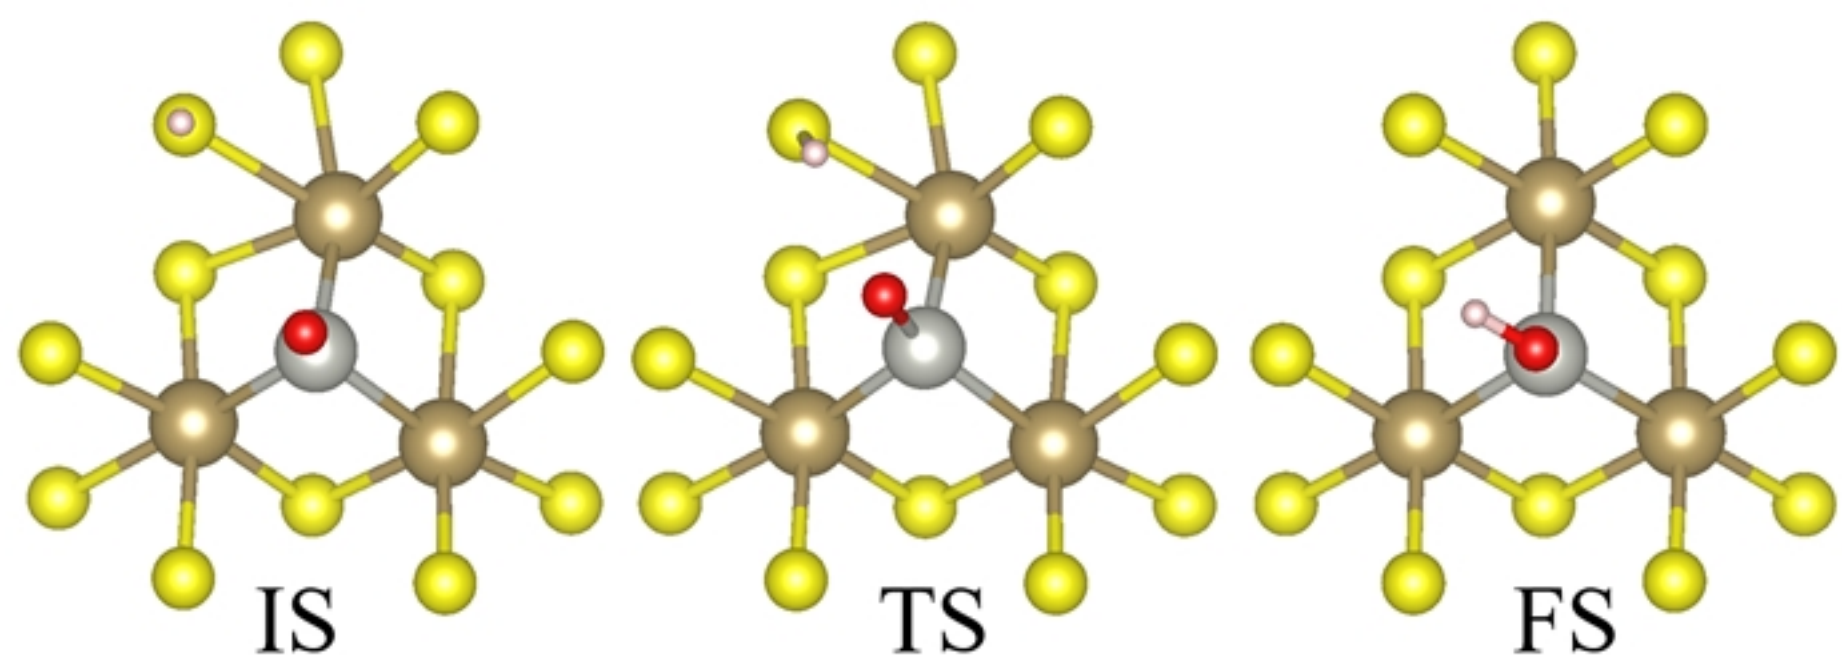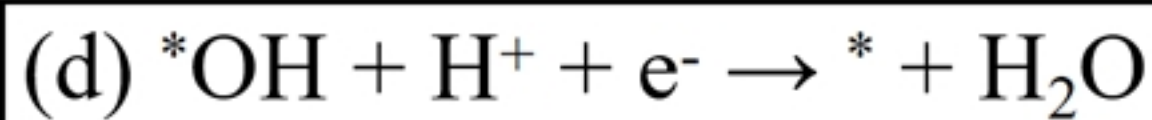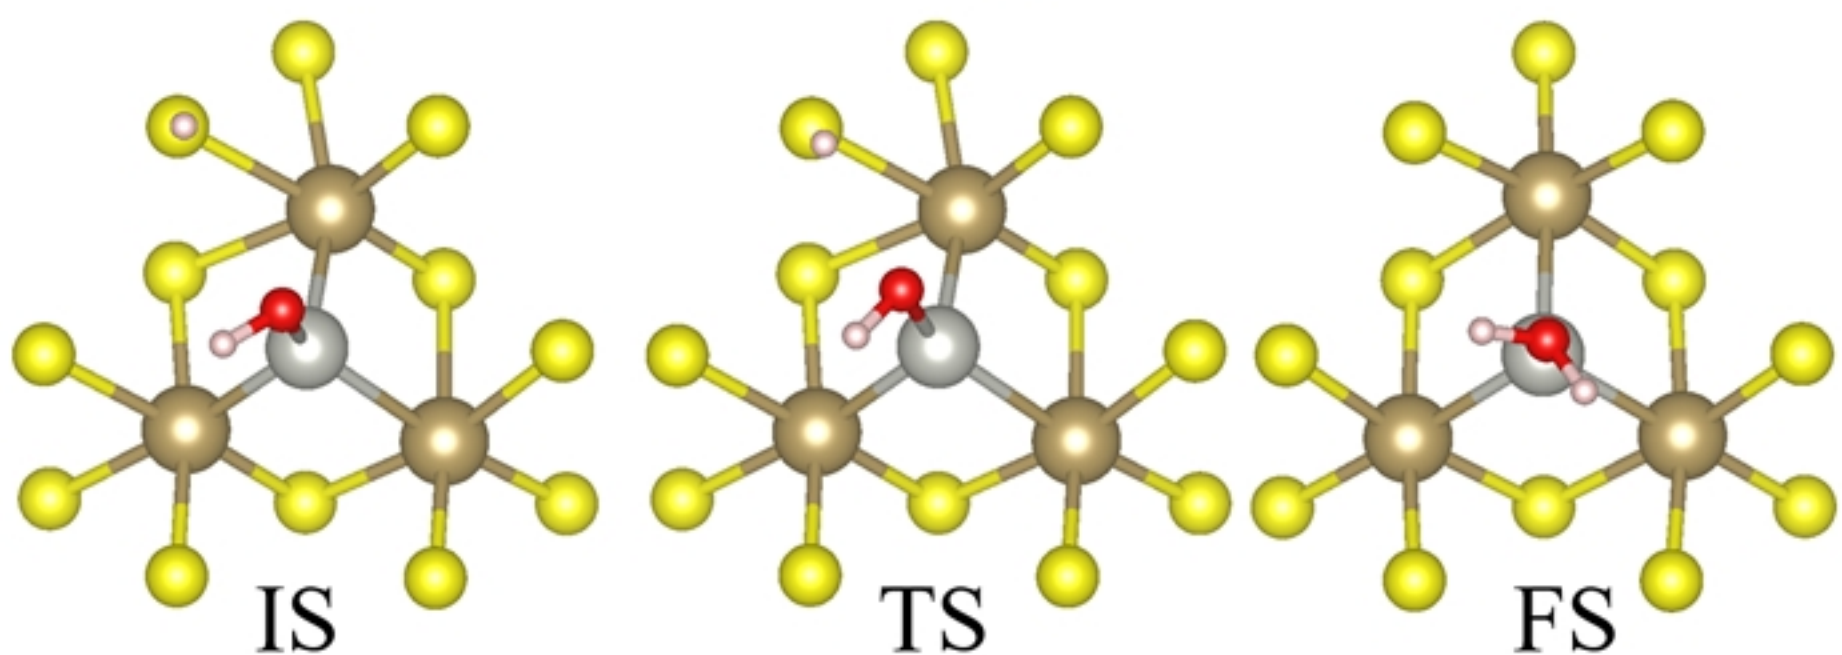

Supplement: d5cp00809c2.zip [file d5cp00809c2.zip]

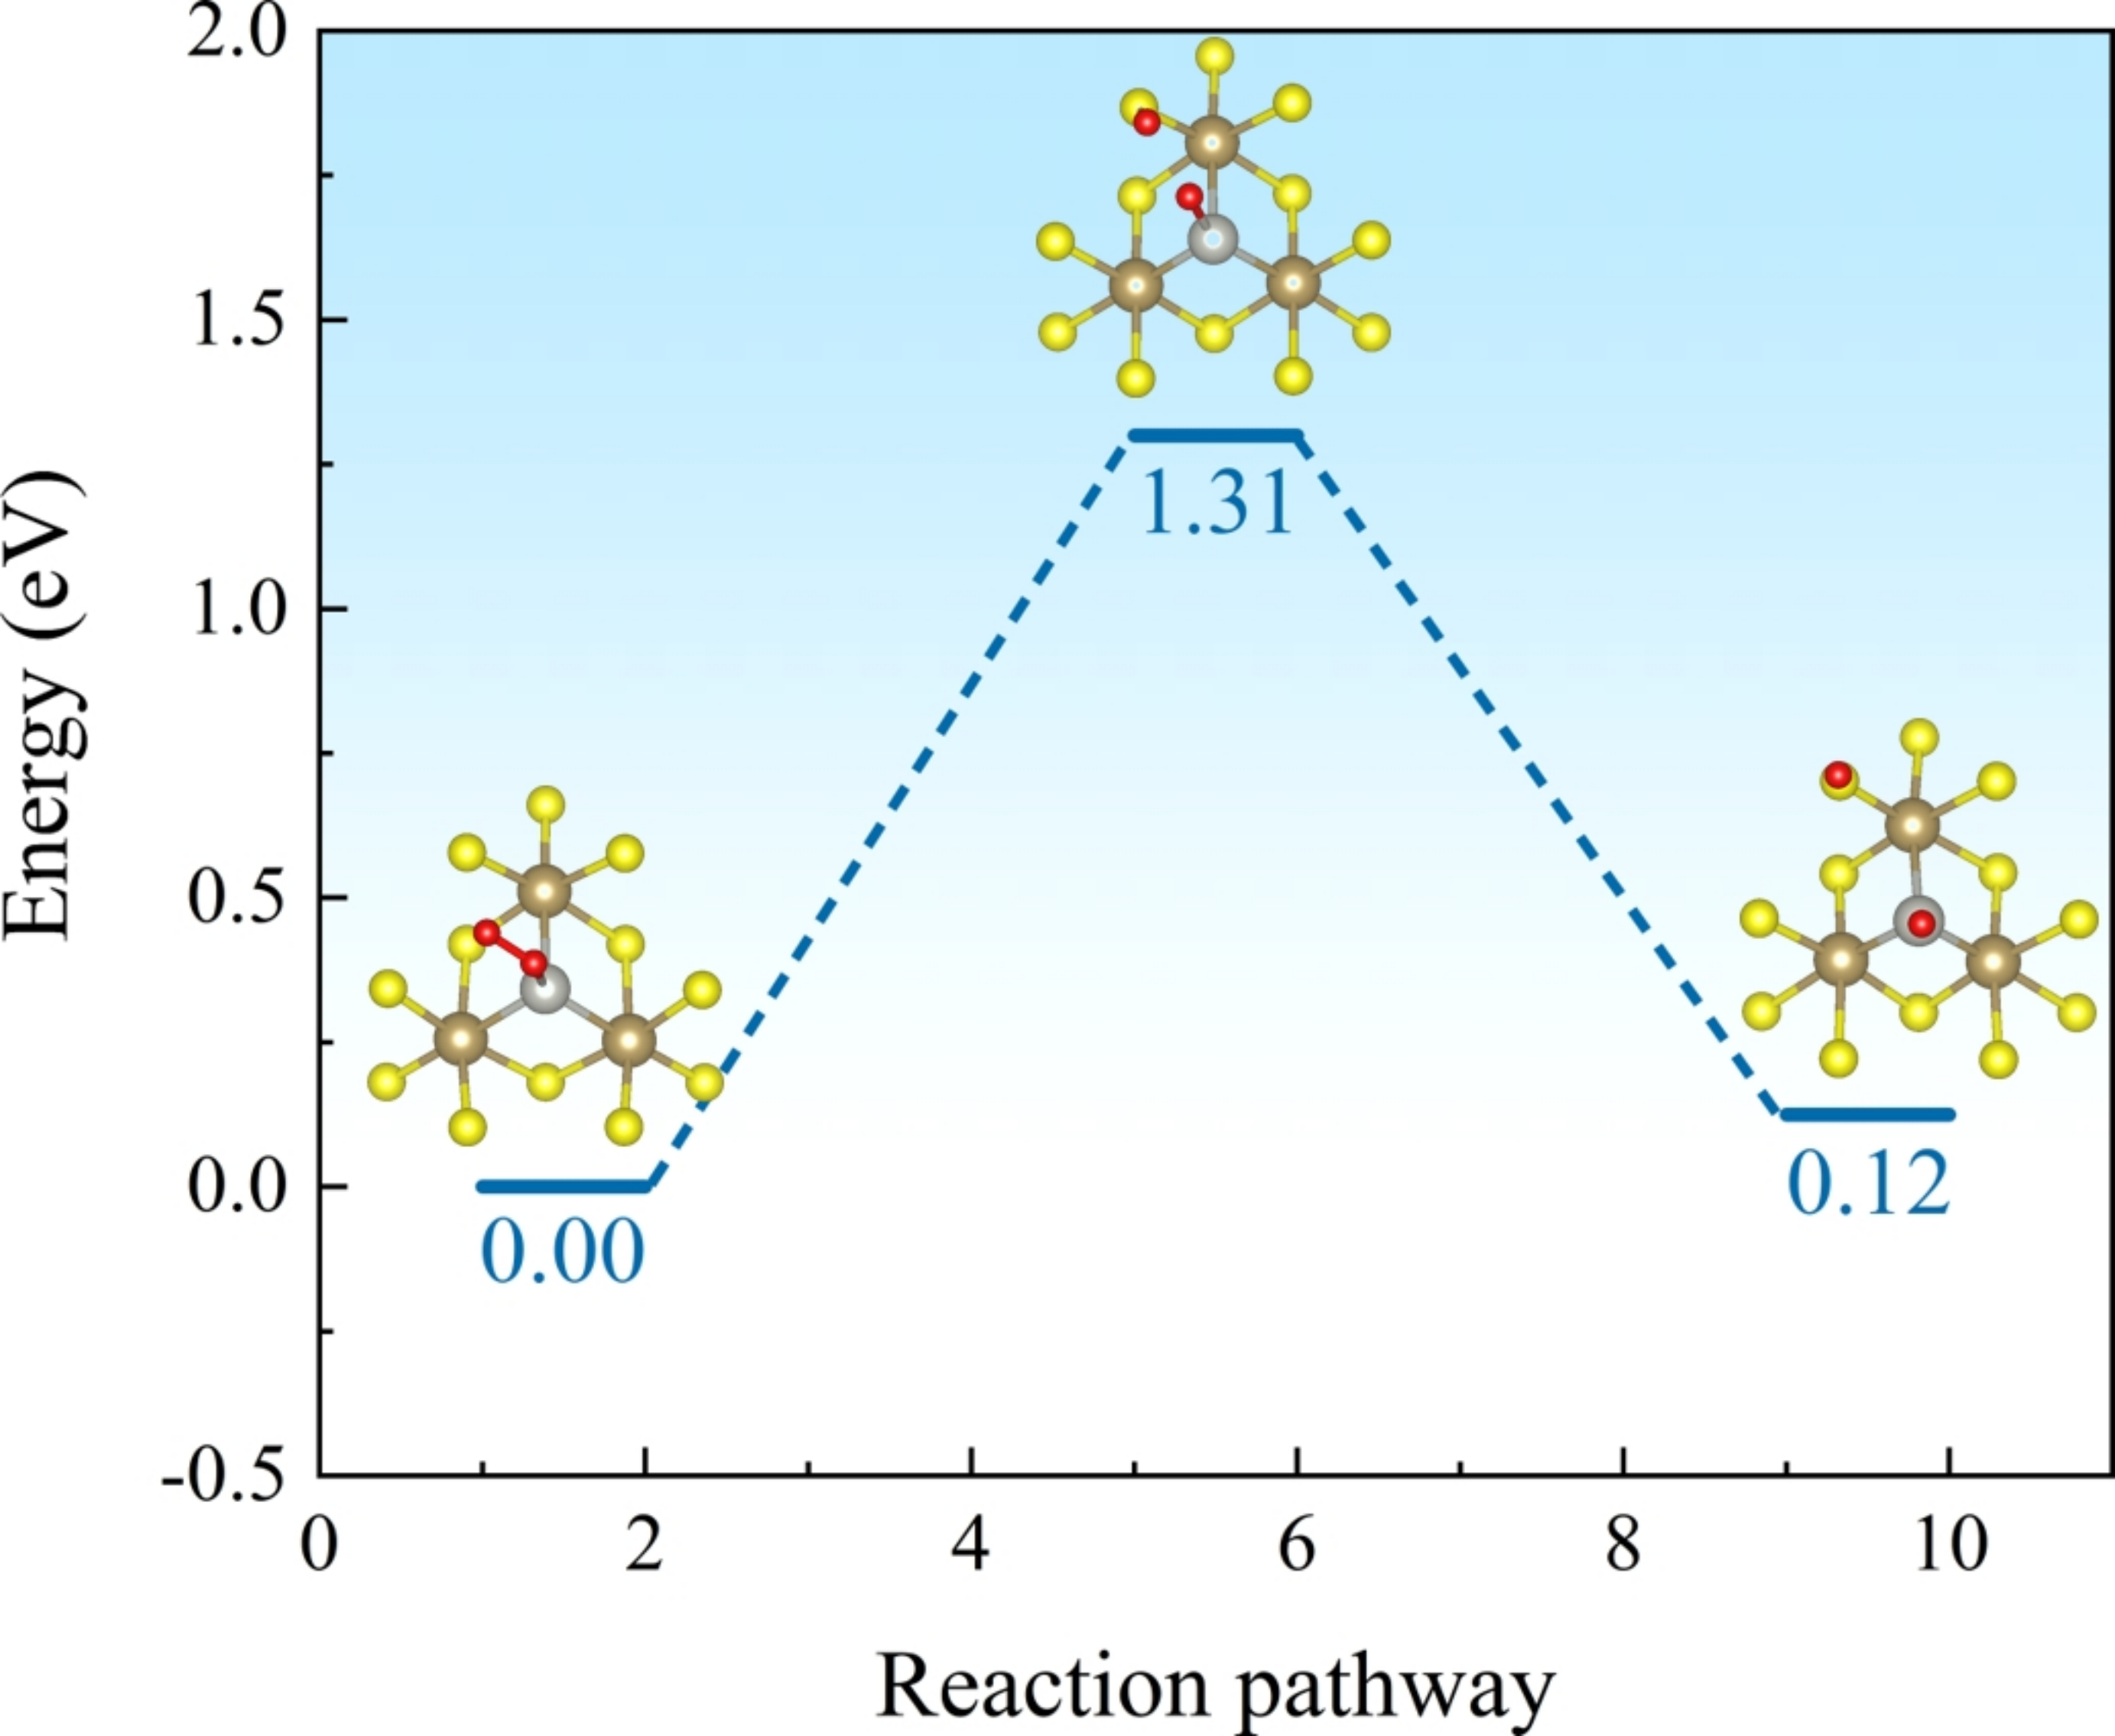

Supplement: d5cp00809c2.zip [file d5cp00809c2.zip]
